# Supplementary material for: Essential Oils of Gardenia jasminoides J. Ellis and Gardenia jasminoides f. longicarpa Z.W. Xie & M. Okada Flowers: Chemical Characterization and Assessment of Anti-Inflammatory Effects in Alveolar Macrophage
Source: MDPI journal article supplement (doi:10.3390/pharmaceutics14050966), 2022-04-29
Supplement: s1 [file s1]

# Supplementary Materials: Essential Oils of *Gardenia jasminoides* J. Ellis and *Gardenia jasminoides* f. *longicarpa* Z.W. Xie & M. Okada Flowers: Chemical Characterization and Assessment of Anti-Inflammatory Effects in Alveolar Macrophage

Nan Zhang, Ying Bian and Lei Yao \*

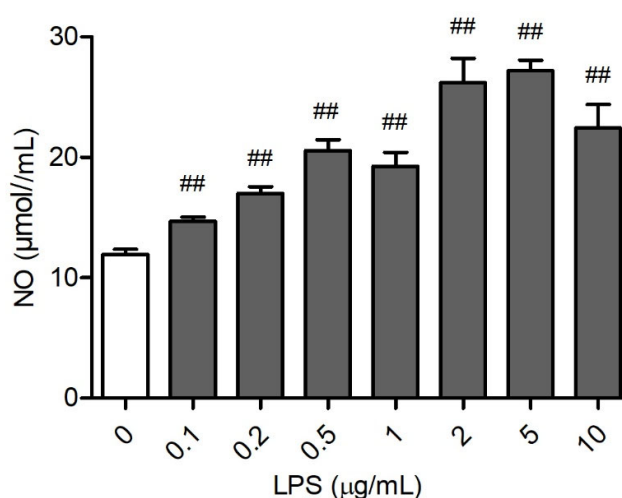

**Figure S1.** The effect of LPS dose on the NO release in MH-S cells. Values represent the mean  $\pm$  S.D., ##  $p < 0.01$  vs. the control treatment group without LPS. One-way ANOVA was used, and Duncan test was used for post hoc.
